# Supplementary material for: Cockayne syndrome B protein regulates recruitment of the Elongin A ubiquitin ligase to sites of DNA damage
Source: PubMed Central journal article supplement (PMC5399097; doi:10.1074/jbc.c117.777946), 2017-03-14

## Supplemental Material

### Cockayne Syndrome B Protein Regulates Recruitment of the Elongin A Ubiquitin Ligase to Sites of DNA Damage

Juston C. Weems<sup>1</sup>, Brian D. Slaughter<sup>1</sup>, Jay R. Unruh<sup>1</sup>, Stefan Boeing<sup>2</sup>, Shawn M. Hall<sup>1</sup>, Merry B. McLaird<sup>1</sup>, Takashi Yasukawa<sup>4</sup>, Tejiro Aso<sup>4</sup>, Jesper Q. Svejstrup<sup>2</sup>, Joan W. Conaway<sup>1,3</sup> and Ronald C. Conaway<sup>1,3</sup>

#### Supplemental Figure Legends

**Supplemental Figure 1.** CSB-dependent recruitment of Elongin A (*A*) and CUL5 (*B*) to localized DNA damage in CS1ANsv cells, transiently transfected (red) or not (black) with GFP-CSB. Recruitment of GFP-CSB is shown in blue. Graphs show mean  $\pm$  SEM, n=18 cells (6 cells from each of 3 independent experiments). Arrows in graphs indicate time of microirradiation; white triangles in images indicate microirradiated regions. Scale bars, 8  $\mu$ m.

**Supplemental Figure 2.** AP-FRET between wild type or mutant Halo-Elongin A labeled with TMRDirect and GFP-CSB (*A*) or Halo-Elongin A labeled with rhodamine 110 and mCherry-CUL5 (*C*). The graphs show individual data points, median, and interquartile ranges obtained from AP-FRET measurements made in a total of 24 cells for each FRET pair (6 cells from each of 4 independent experiments). *B*. Kinetics of recruitment of wild type and mutant Halo-Elongin A (6 cells each from 4 independent experiments). Cells were imaged every second, and intensity values were binned over 5-s intervals. Microirradiation was initiated at time t=0 s. Values represent mean  $\pm$  SEM.

# Supplemental Figure 1

A

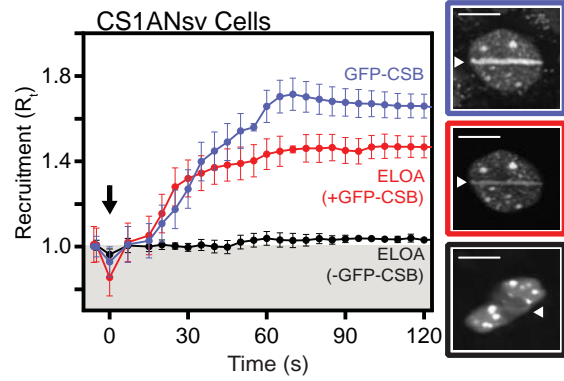

B

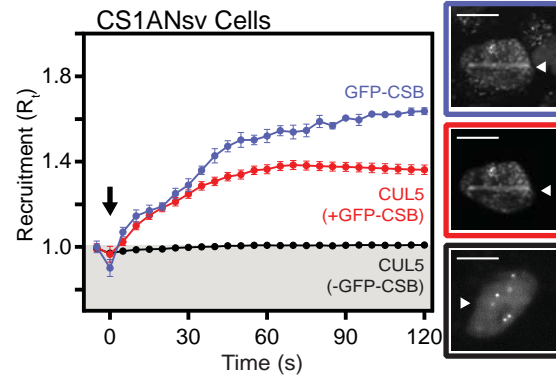

Supplemental Figure 2

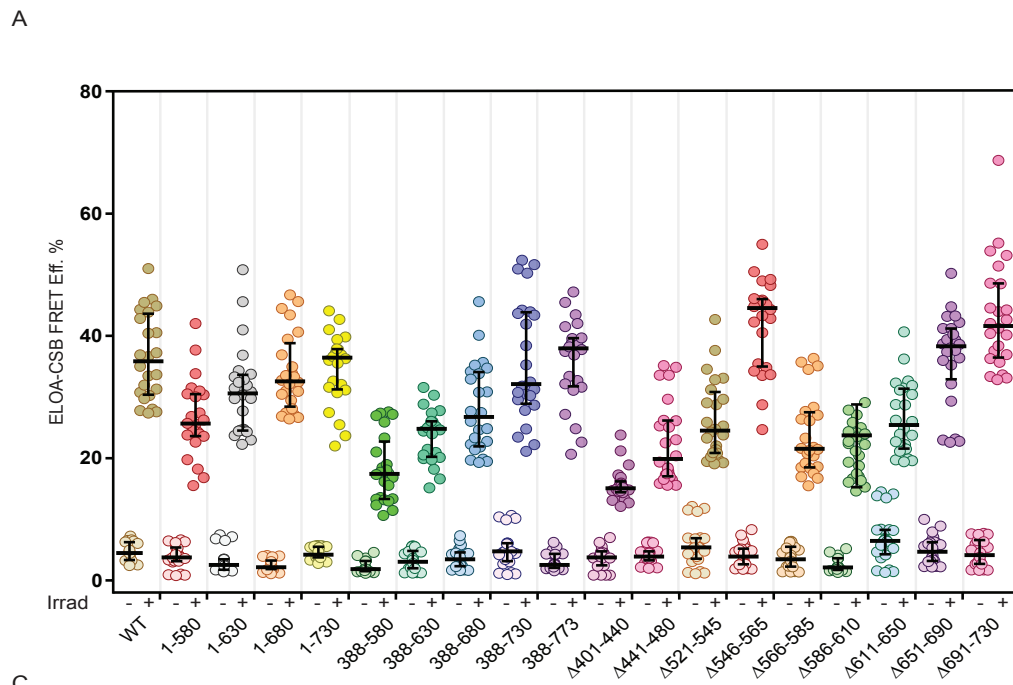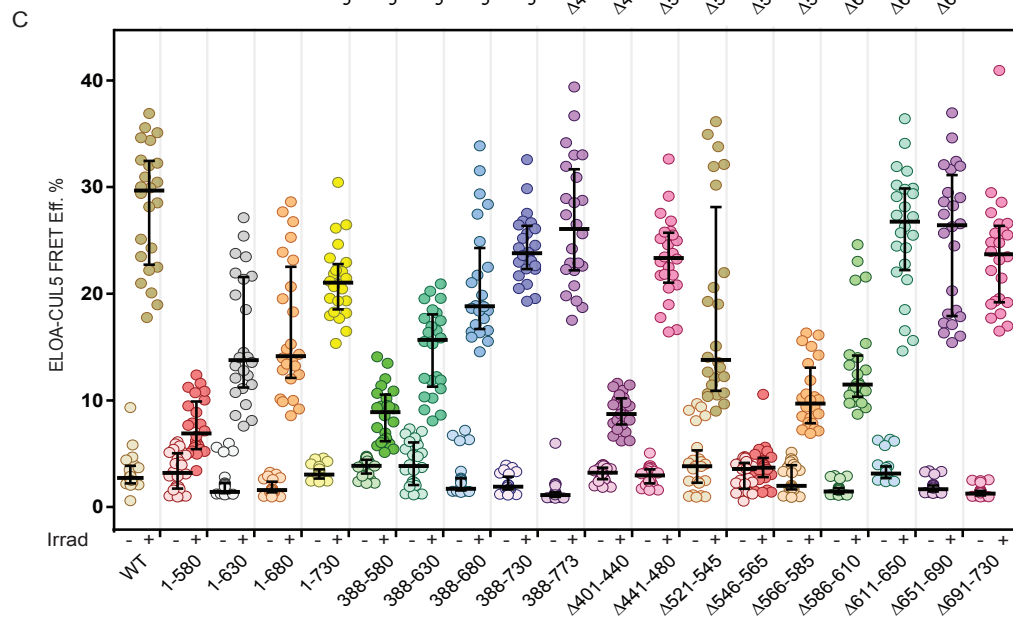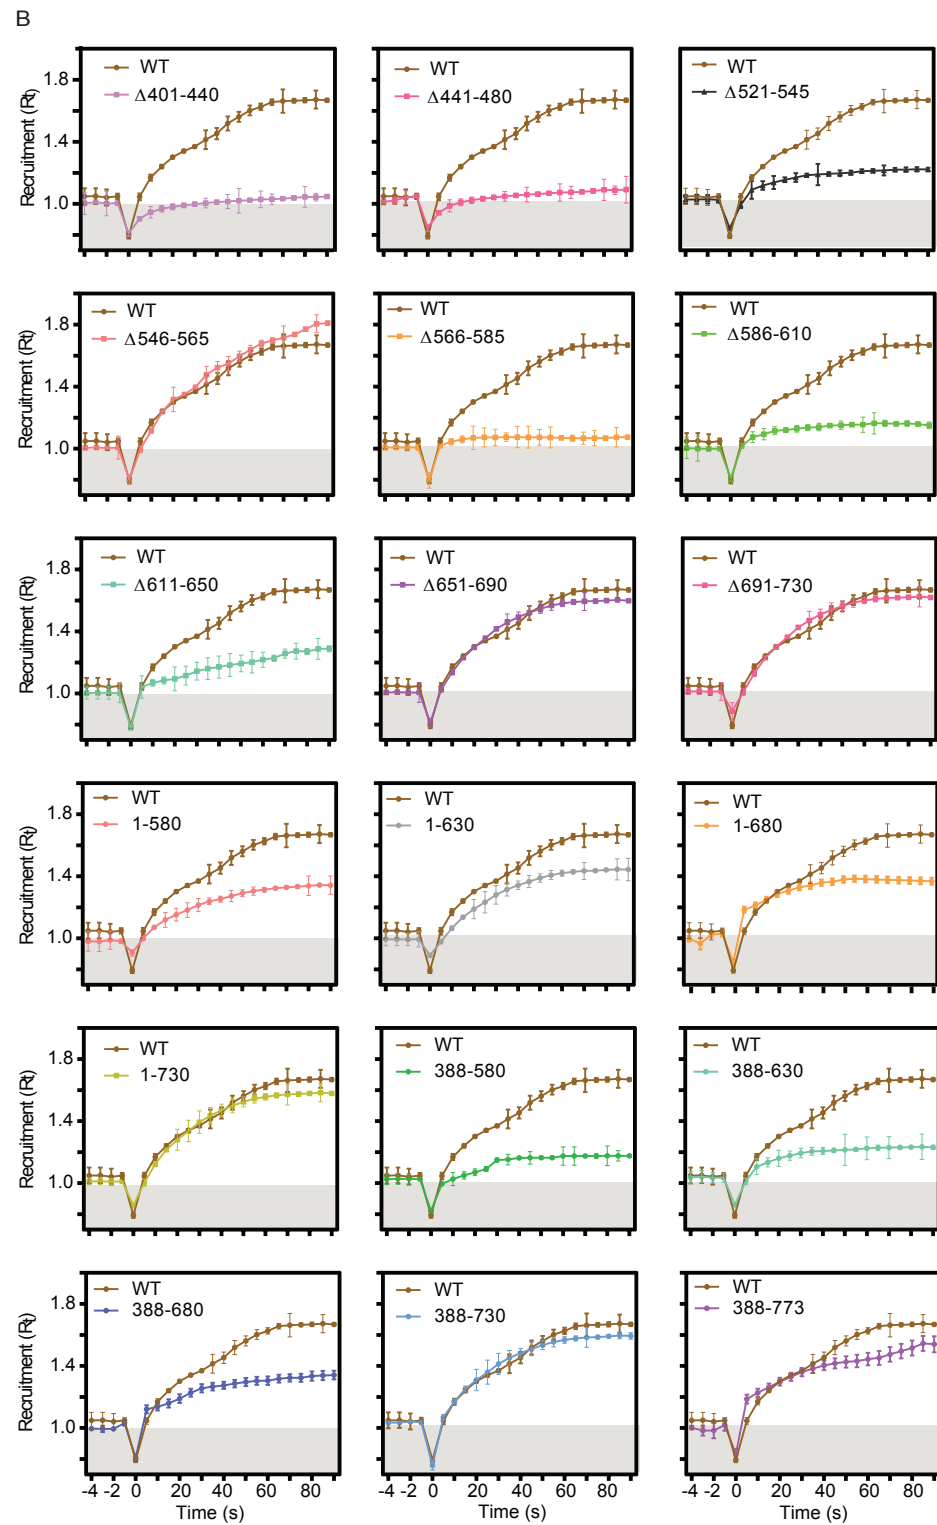

Supplement: 10.1074_C117.777946_jbc.C117.777946-1.pdf [file 10.1074_C117.777946_jbc.C117.777946-1.pdf]
